# Supplementary material
Source: PubMed Central journal article supplement (PMC4227720)
Supplement: ja410560p_si_001.pdf [file ja410560p_si_001.pdf]

## SUPPLEMENTAL INFORMATION

# Characterization of a Cross-linked Protein–Nucleic Acid Substrate Radical in the Reaction Catalyzed by RlmN

Alexey Silakov,<sup>†,\*</sup> Tyler L. Grove,<sup>†,\*</sup> Matthew I. Radle,<sup>‡</sup> Matthew R. Bauerle,<sup>†</sup> Michael T. Green,<sup>†</sup> Amy C. Rosenzweig,<sup>¶</sup> Amie K. Boal,<sup>†,‡,¶,\*</sup> and Squire J. Booker<sup>†,‡,\*</sup>

<sup>†</sup>The Department of Chemistry, and the <sup>‡</sup>Department of Biochemistry and Molecular Biology, The Pennsylvania State University. University Park, PA, 16802, USA. <sup>¶</sup>Departments of Molecular Biosciences and of Chemistry, Northwestern University, Evanston, IL 60208, USA

AUTHOR EMAIL ADDRESS: \*Squire J. Booker (squire@psu.edu); \*Tyler L. Grove (tlg224@psu.edu); \*Alexey Silakov (alexey.silakov@gmail.com); and \*Amie K. Boal (akb20@psu.edu).

**Table S1:** Primers for constructing the RlmN and Cfr variants\*

| <b>Primer</b>     | <b>Sequence</b>                                                                            |
|-------------------|--------------------------------------------------------------------------------------------|
| <b>RlmN C118S</b> | Forward 5'- cga ccg tgc cac gct <b><u>ctc</u></b> cgt ctc ttc gca ggt ggg g -3'            |
|                   | Reverse 5'- ccc cac ctg cga aga gac <b><u>gga</u></b> gag cgt ggc acg gtc g -3'            |
| <b>Cfr C105A</b>  | Forward 5'- gga aag ctt <b><u>tgc</u></b> tat tag cag cca gtg tgg -3'                      |
|                   | Reverse 5'- cca cac tgg ctg cta <b><u>ata</u></b> <b><u>gca</u></b> aag ctt tcc -3'        |
| <b>RlmN E105A</b> | Forward 5'- ggc gat cag cgc gtc <b><u>gca</u></b> acg gtg tat atc ccg g - 3'               |
|                   | Reverse 5'- ccg gga tat aca ccg <b><u>tgc</u></b> <b><u>cga</u></b> cgc gct gat cgc c - 3' |

\*Bold and underlined nucleotides indicate the variant codon.

**Table S2:** Fe and S<sup>2-</sup> content and UV-vis characteristics of apo RlmN C118S

|                       | A <sub>280</sub> /A <sub>400</sub> ratio |      | Fe per polypeptide |       | S <sup>2-</sup> per polypeptide |       |
|-----------------------|------------------------------------------|------|--------------------|-------|---------------------------------|-------|
|                       | AI                                       | RCN  | AI                 | RCN   | AI                              | RCN   |
| RlmN <sub>C118S</sub> | NA                                       | 2.75 | 0.184              | 2.732 | 0.231                           | 3.745 |

**Table S3.** Data collection and refinement statistics for C118A RlmN and C118A RlmN+SAM X-ray structures.

|                                        | C118A RlmN+SAM          | C118A RlmN              |
|----------------------------------------|-------------------------|-------------------------|
| <b>Data collection</b>                 |                         |                         |
| Wavelength                             | 0.97857 Å               | 0.97857 Å               |
| Space group                            | $P2_12_12_1$            | $P2_12_12_1$            |
| Cell dimensions                        |                         |                         |
| <i>a</i> , <i>b</i> , <i>c</i> (Å)     | 55.627, 55.729, 254.032 | 55.438, 55.384, 262.377 |
| Resolution (Å)                         | 30.00-2.58 (2.65-2.58)  | 50.00-2.20 (2.24-2.20)  |
| $R_{\text{sym}}$ or $R_{\text{merge}}$ | 0.116 (0.536)           | 0.075 (0.503)           |
| $I / \sigma I$                         | 16.6 (2.2)              | 19.5 (2.5)              |
| Completeness (%)                       | 95.7 (85.5)             | 96.3 (96.7)             |
| Redundancy                             | 5.9 (3.7)               | 5.7 (4.7)               |
| <b>Refinement</b>                      |                         |                         |
| Resolution (Å)                         | 30.00-2.58              | 50.00-2.20              |
| No. reflections                        | 23121                   | 38412                   |
| $R_{\text{work}} / R_{\text{free}}$    | 0.263/0.299             | 0.2055/0.2435           |
| No. atoms                              |                         |                         |
| Protein                                | 5453                    | 5552                    |
| Ligand                                 | 70                      | 16                      |
| Water                                  | 0                       | 231                     |
| <i>B</i> -factors                      |                         |                         |
| Protein                                | 58.0                    | 34.4                    |
| Ligand                                 | 58.0                    | 33.9                    |
| Water                                  | N/A                     | 40.0                    |
| r.m.s. deviations                      |                         |                         |
| Bond lengths (Å)                       | 0.006                   | 0.005                   |
| Bond angles (°)                        | 1.036                   | 0.980                   |

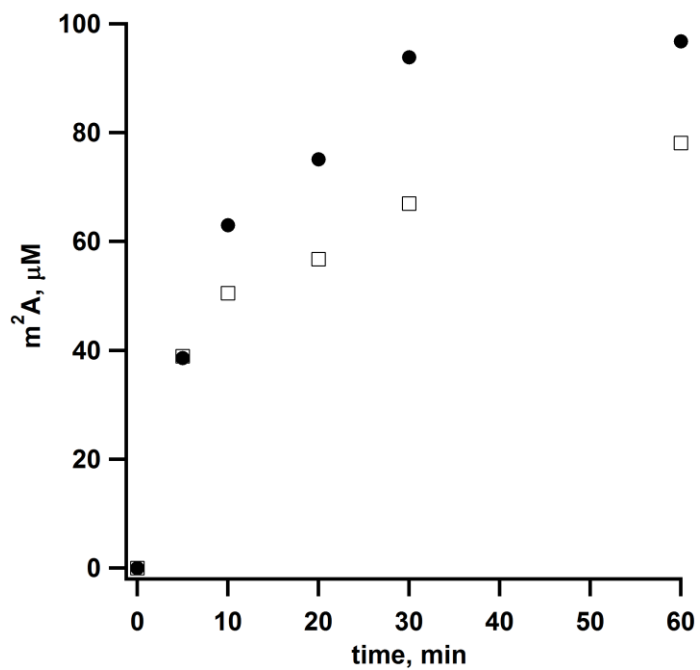

**Figure S1.** Production of m<sup>2</sup>A catalyzed by wt RlmN (black circles) and RlmN E105A (open squares). Assays contained 10 µM wt RlmN or RlmN E105A, 100 µM 155-mer, and 2 mM SAM. Reactions were initiated with addition of 2 mM dithionite.

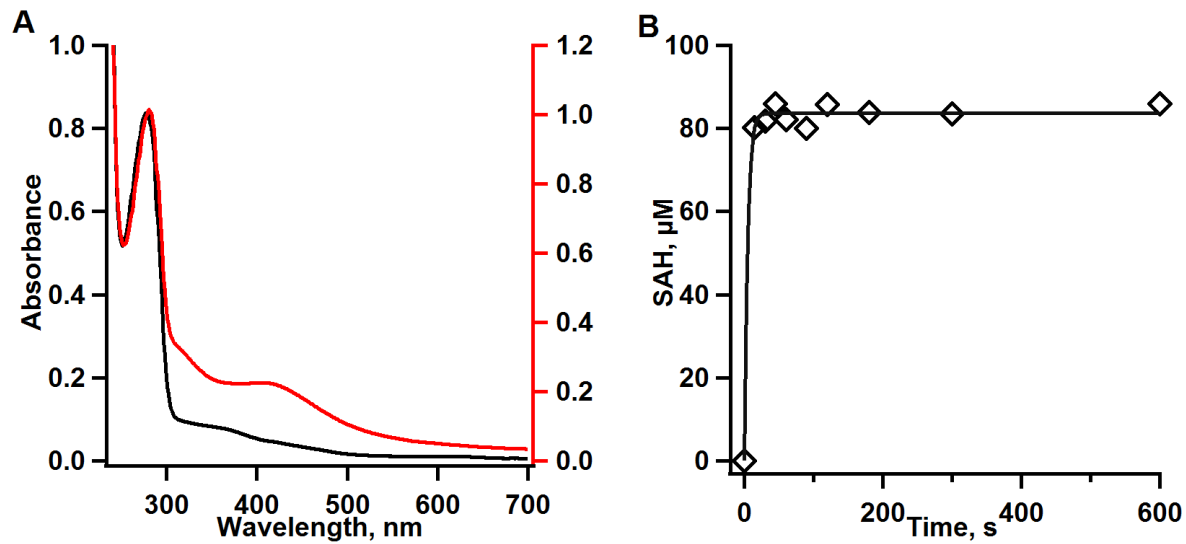

**Figure S2:** Characterization of the RlmN C118S variant. (A) UV/vis spectrum of apo as-isolated (black, 25  $\mu\text{M}$ ) and reconstituted (red, 19  $\mu\text{M}$ ) RlmN C118S. (B) SAH formation in the presence of 2 mM SAM and 105  $\mu\text{M}$  apo RlmN<sub>C118S→RCN</sub>. The line represents the fit of SAH formation to a pseudo-first order equation, yielding an amplitude of 83  $\mu\text{M}$  SAH.

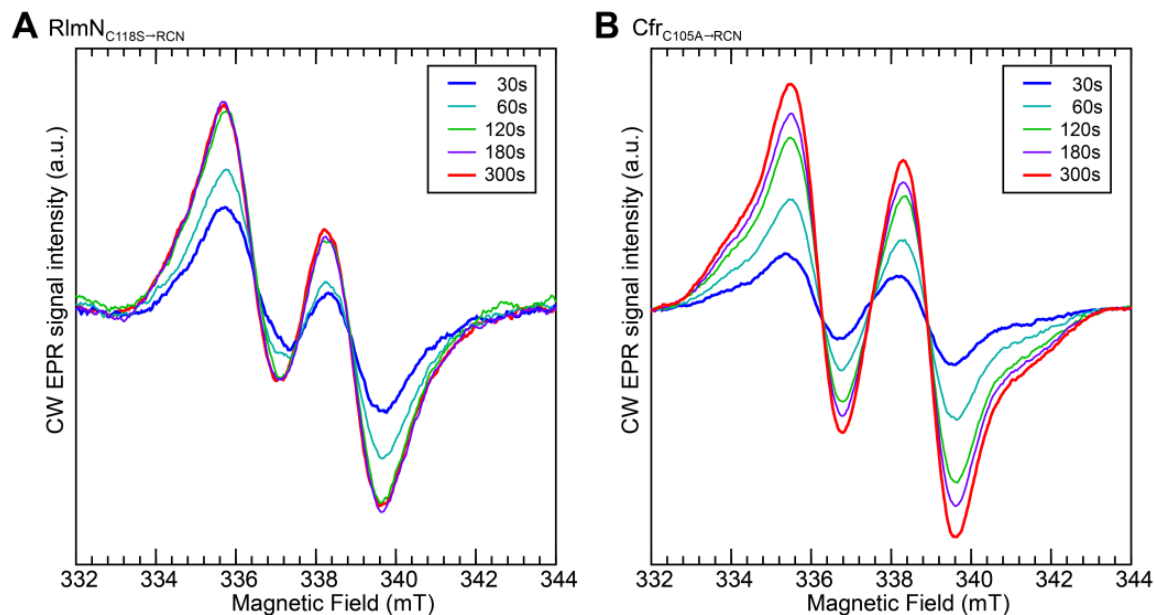

**Figure S3:** EPR spectra of the cross-linked radical species observed for RlmN<sub>C118S→RCN</sub> (A) and Cfr<sub>C105A→RCN</sub> (B) at different times after initiating the reaction (see main text). We note that the shape and the doublet splitting in the EPR spectrum of the Cfr<sub>C105A→RCN</sub> variant is virtually identical to the one observed in the wt Cfr spectrum, indicating that the C105A amino acid substitution does not substantially perturb the electronic structure and geometry of the cross-linked radical species. Measurements were performed with settings identical those indicated in Figure 2, except that the modulation amplitude was set to 10 G.

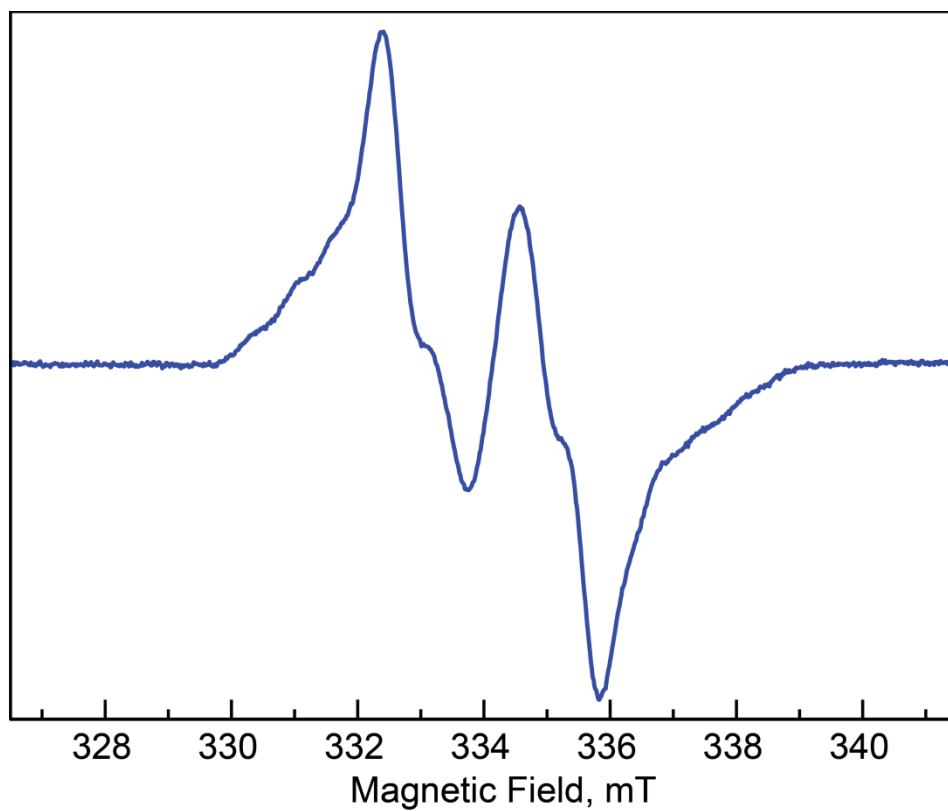

**Figure S4.** EPR spectrum of the R1mN C118A-155mer cross-linked radical species. Experimental conditions: temperature, 70K; modulation amplitude, 5G; microwave power, 0.12mW; microwave frequency, 9.38 GHz.



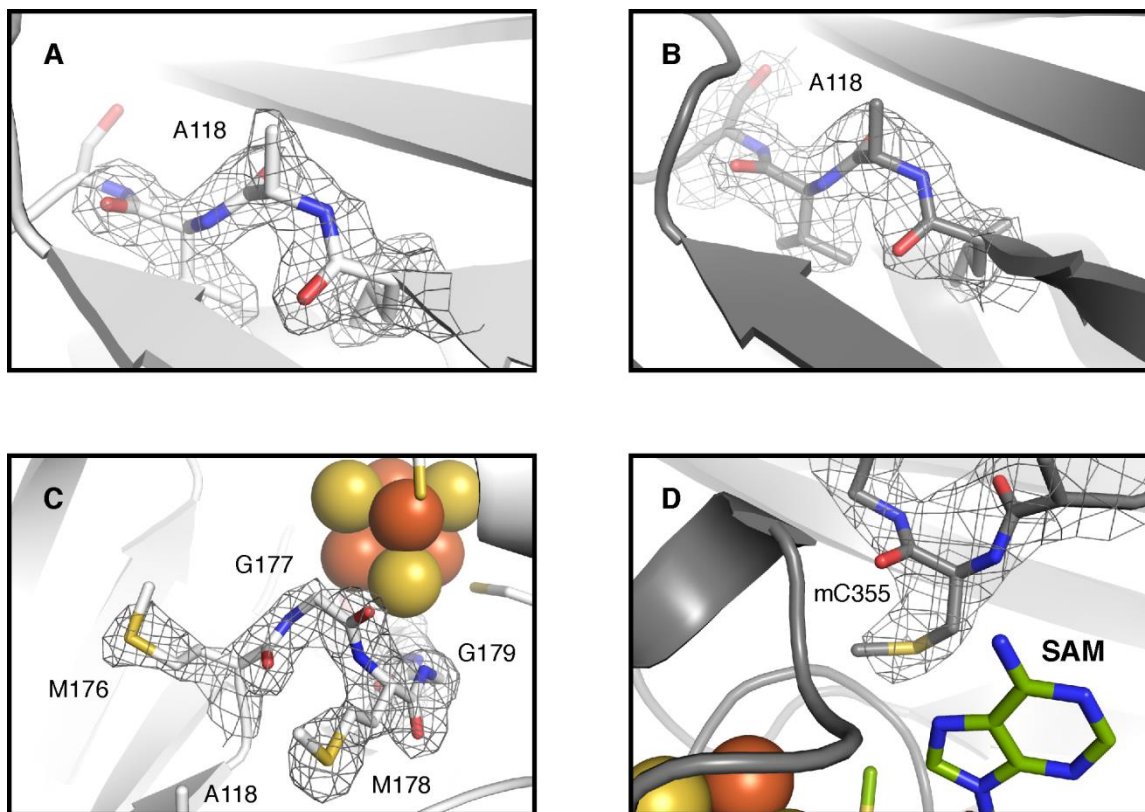

**Figure S5.** Comparative views of the active site in the C118A RlmN and C118A RlmN + SAM X-ray structures. **A**  $2F_o-F_c$  electron density map (gray mesh) for residue 118 and surrounding amino acids in C118A RlmN (**A**) (contoured at  $1.5\sigma$ ) and C118A RlmN + SAM (**B**) (contoured at  $1.2\sigma$ ). A  $2F_o-F_c$  electron density map is also shown (gray mesh) for the region in C118A RlmN that undergoes a conformational change (residues 176-180) in the absence of SAM (**C**) (contoured at  $1.5\sigma$ ) and for the region near mCys355 in C118A RlmN + SAM (**D**) (contoured at  $1.0\sigma$ ).
